# Supplementary material for: Asbestos accelerates disease onset in a genetic model of malignant pleural mesothelioma
Source: PubMed Central journal article supplement (PMC10333928; doi:10.3389/ftox.2023.1200650), 2023-06-27
Supplement: DataSheet1.pdf [file DataSheet1.pdf]

## *Supplementary Material*

### **Asbestos accelerates disease onset in a genetic model of Malignant Pleural Mesothelioma**

Pooyeh Farahmand, Katarina Gyuraszova, Claire Rooney, Ximena L. Raffo-Iraolagoitia, Geeshath Jayasekera, AnnHedley, Emma Johnson, Tatyana Chernova, Gaurav Malviya, Holly Hall, Tiziana Monteverde, Kevin Blyth, Roger Duffin, Leo M. Carlin, David Lewis, John le Quesne, Marion MacFarlane & Daniel J. Murphy

**\* Correspondence:**

[Daniel.murphy@glasgow.ac.uk](mailto:Daniel.murphy@glasgow.ac.uk)

[MM2312@mrc-tox.cam.ac.uk](mailto:MM2312@mrc-tox.cam.ac.uk)

#### **List of Supplemental Material**

Figure S1. Examples of immunohistochemical detection of Mesothelin expression on diaphragm pleura.

Figure S2. MRI imaging of pleural effusion and mesothelioma in CNP mice induced with lenti-Cre + asbestos

Figure S3. Detection of major leukocyte populations in pleural lavage from pre-symptomatic CNP mice induced with lenti-Cre + asbestos

**Figure S1**

Mesothelin

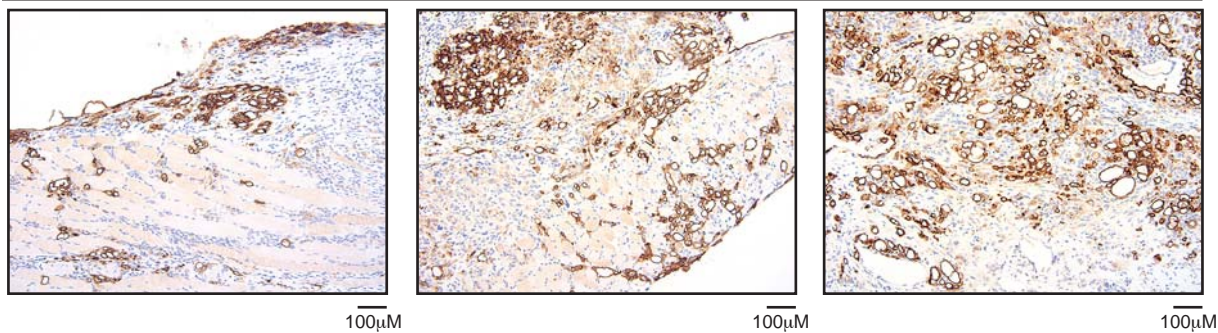

**Figure S2**

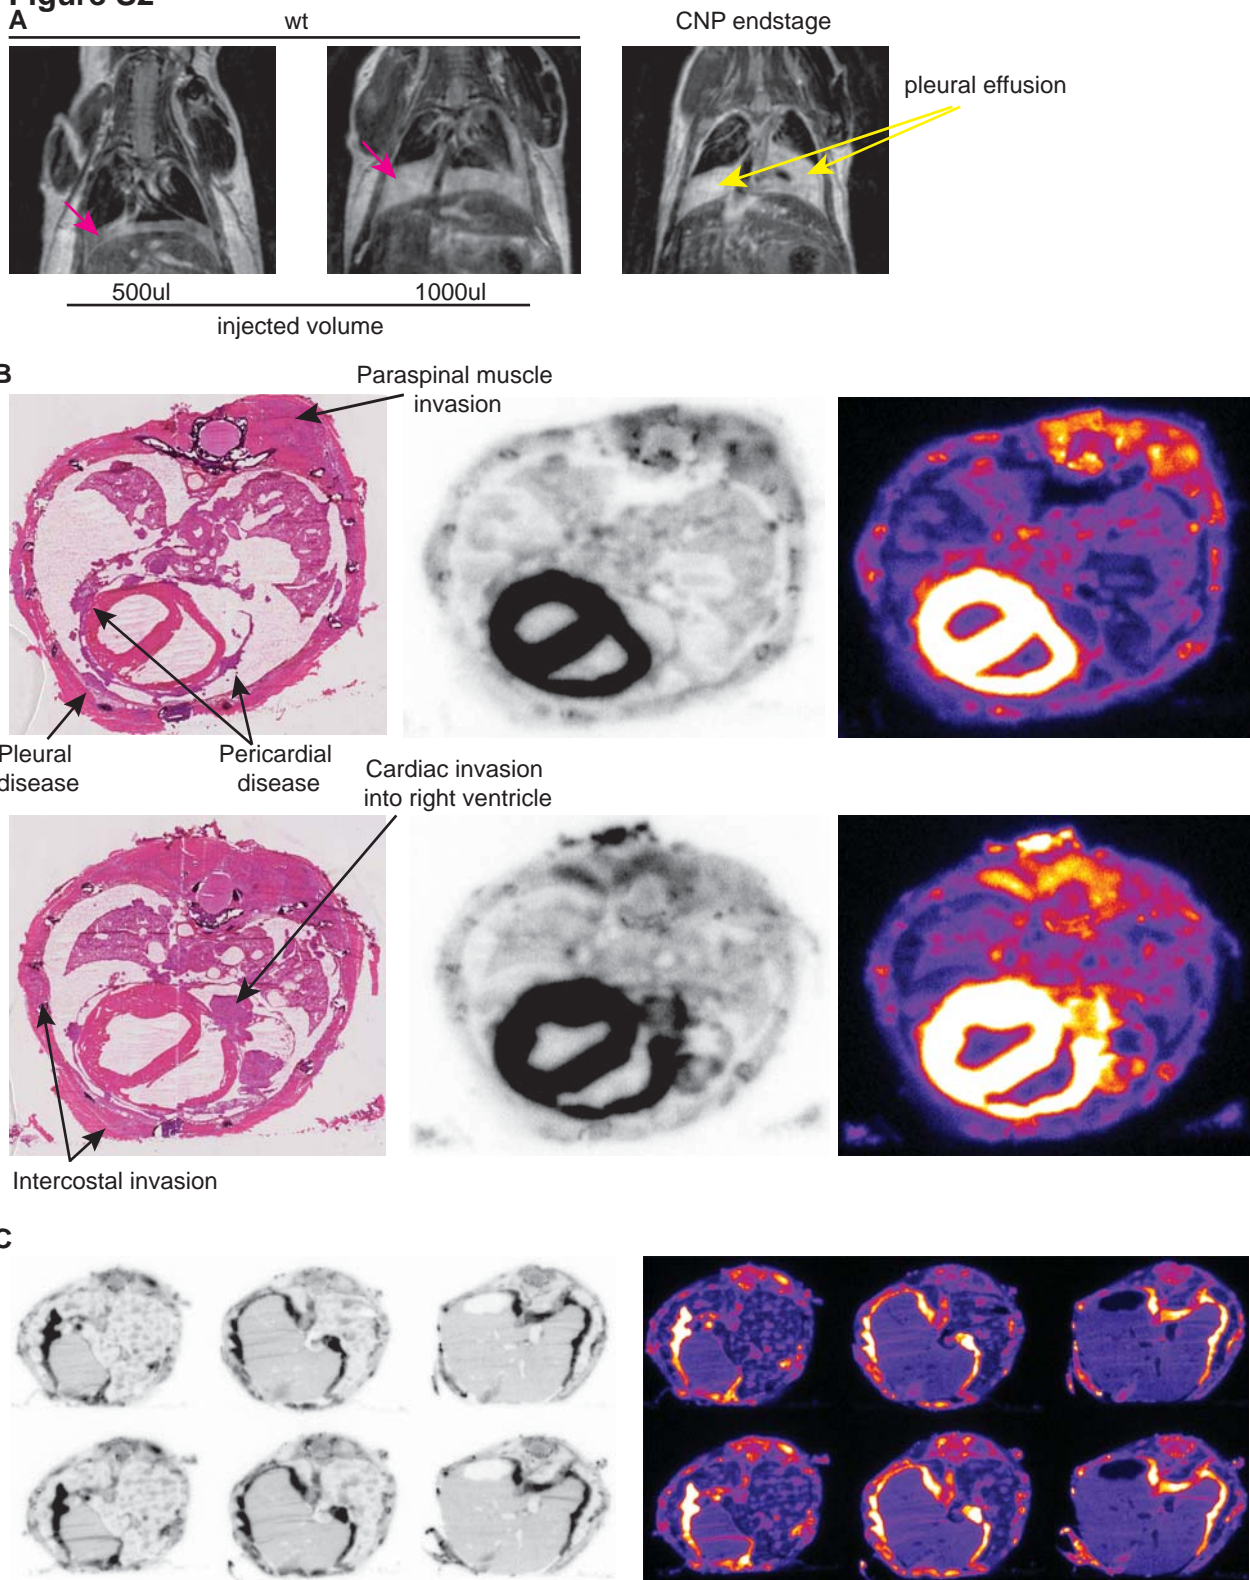

**Figure S3**

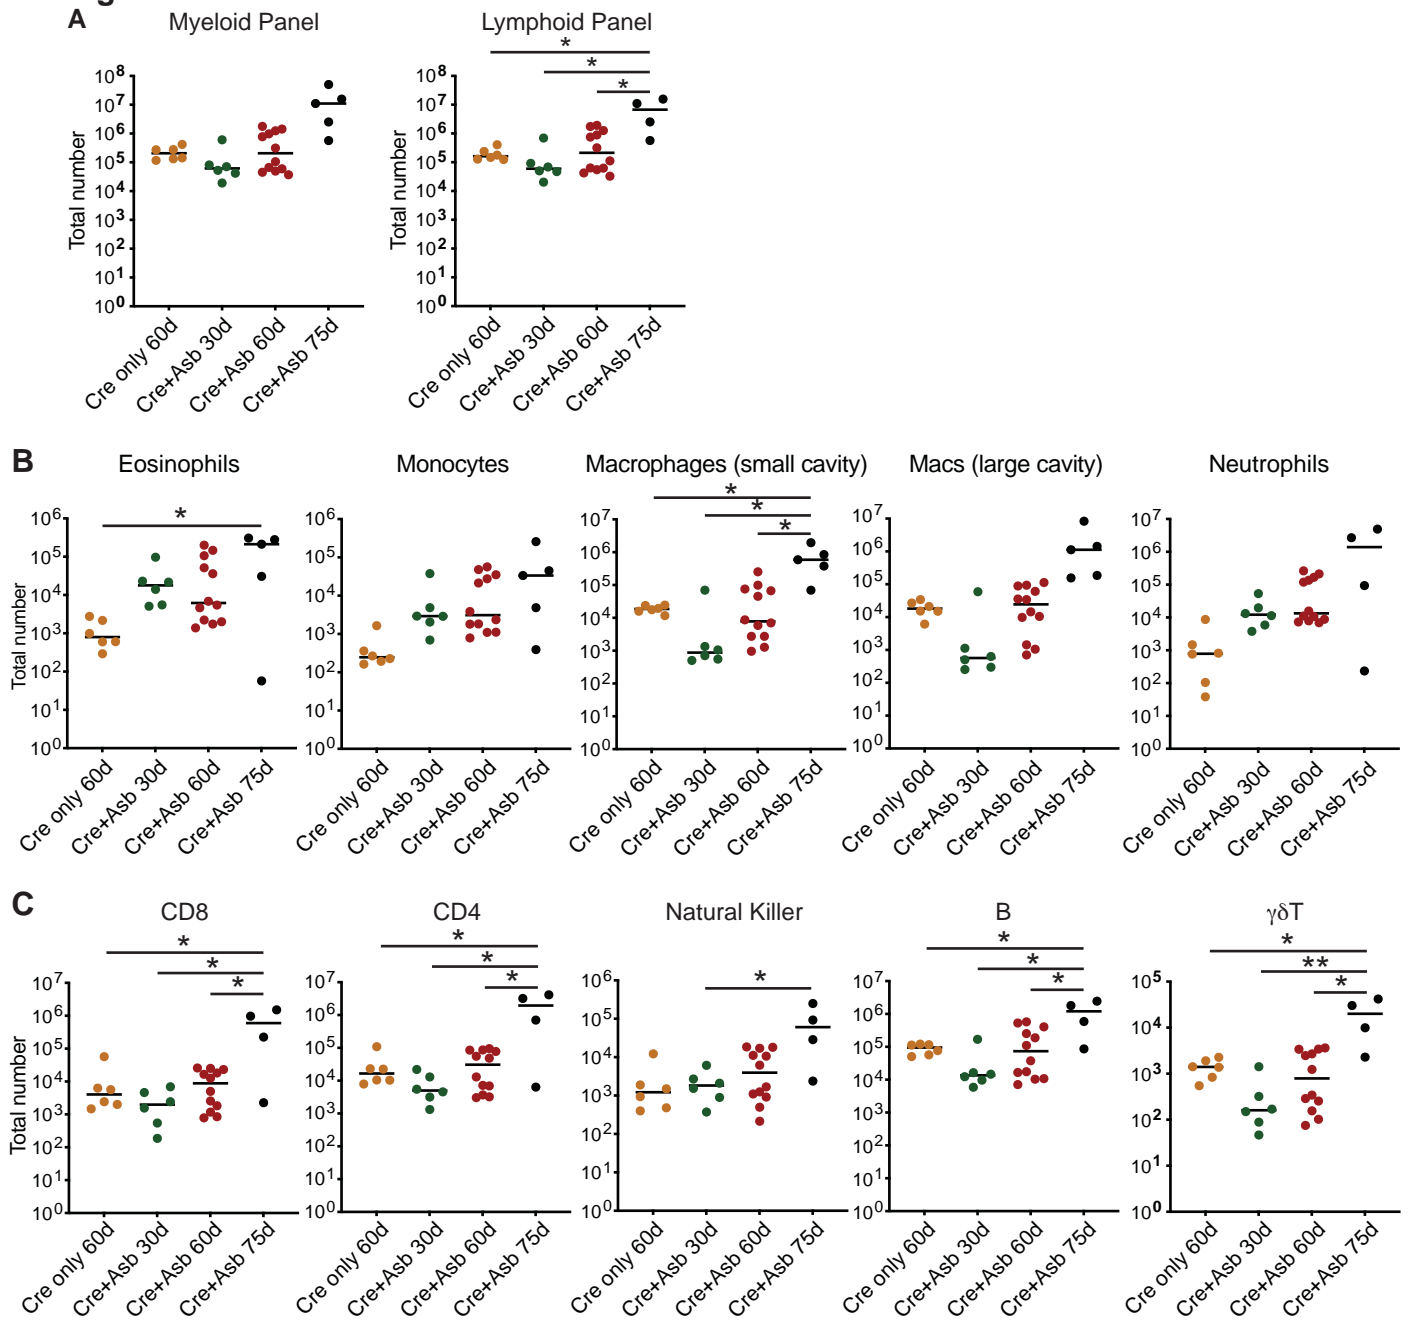

**Figure S1. Examples of immunohistochemical detection of Mesothelin expression on diaphragm pleura.**

Representative images of diaphragm pleural tumours stained with anti-Mesothelin antibody (Invitrogen PA5-79698, dilution 1:500, high pH antigen retrieval). Scale bars = 100 $\mu$ M.

**Figure S2. MR imaging of pleural effusion and mesothelioma in CNP mice induced with lenti-Cre + asbestos**

**A)** Detection of sham (left and centre panels) or spontaneous (right panel) pleural effusion by MRI. Left to right: T2-weighted coronal/sagittal image of a wildtype mouse with a 0.5 ml intrapleural injection; T2-weighted coronal/sagittal image of a wildtype mouse with a 1 ml intrapleural injection; T2-weighted coronal/sagittal image of a terminal CNP mouse with disease associated pleural effusion. Pink arrows point to bilateral injected fluid collection; yellow arrows show pleural effusion. **B)** [ $^{18}$ F]-FDG PET/MR imaging of CNP an exemplar mouse (of 2 imaged) induced with lenti-Cre + asbestos at end-stage. Transverse sections through the chest cavity showing H&E stained tissue (left panels) and [ $^{18}$ F]-FDG detection by autoradiography in brightfield (centre panels) and false-colour (right panels) of corresponding whole mount sections. Invasive, pericardial and pleural disease indicated by arrows. **C)** Autoradiography of [ $^{18}$ F]-FDG detection showing extent of pleural disease in an exemplar mouse in brightfield (left) and false colour (right). Note detection of pleural effusion in the 3<sup>rd</sup> section from left (white area in brightfield, black area in false colour).

**Figure S3. Detection of major leukocyte populations in pleural lavage from pre-symptomatic CNP mice induced with lenti-Cre + asbestos**

**A)** FACS quantification of total WBC count/ml of pleural lavage from CNP mice induced with lenti-Cre alone (N=6; day 60) or lenti-Cre + Asbestos, harvested at 30 (N=6), 60 (N=12), or 75 (N=5) days post induction. Left panel shows total CD45+ cell counts per mouse, stained with the Myeloid marker panel; right panel shows total CD45+ cell counts per mouse, stained with the Lymphoid marker panel. **B)** Major Myeloid cell populations quantified from (A). **C)** Major Lymphoid populations quantified from (A). \*\* denotes  $P < 0.01$ ; \* denotes  $P < 0.05$ , 2-way ANOVA with post-hoc Tukey test.
